# Supplementary material
Source: PubMed Central journal article supplement (PMC5437919)
Supplement: ismej2016185x5.pdf [file ismej2016185x5.pdf]

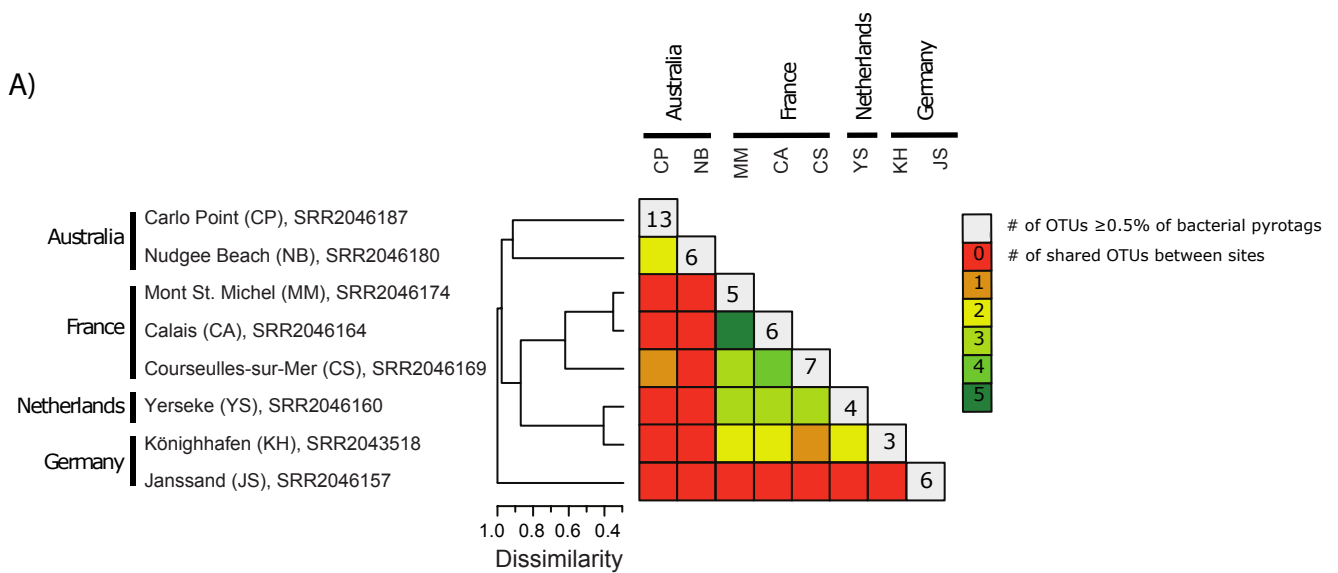

B)

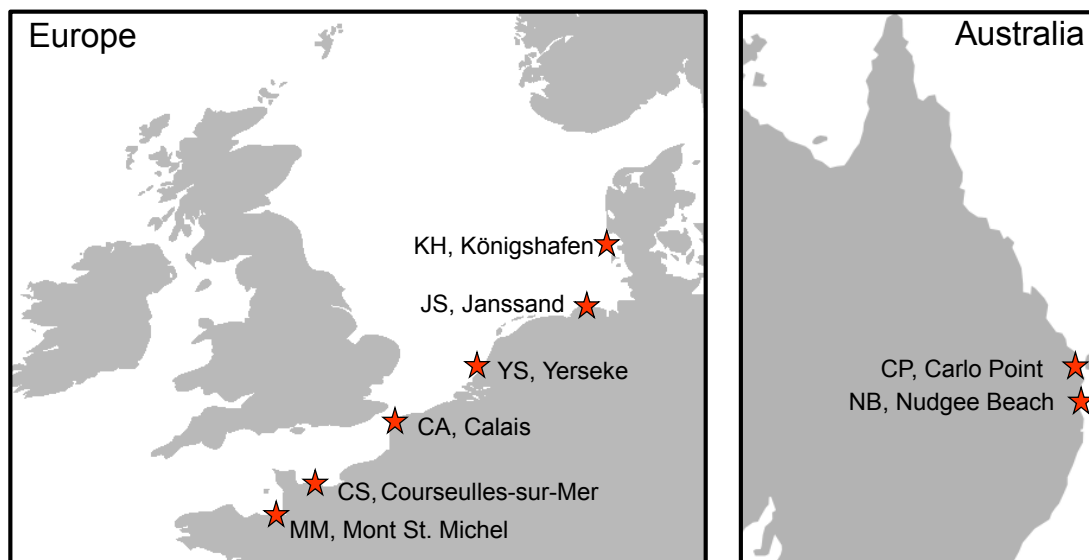

**Figure S2.** A) Bray-Curtis dissimilarity calculated using only *Woeseiaceae*/JTB255 OTUs accounting for  $\geq 0.5\%$  of all bacterial sequences in the surface layer (0-1 cm depth) in at least one of the 8 tidal sediments. The heat map depicts the number of operational taxonomical units (OTUs, 98% sequence identity cut-off) that co-occurred between sites. B) Sampling sites (modified from Dykstra *et al.*, 2016).
