# Supplementary material
Source: PubMed Central journal article supplement (PMC5437919)
Supplement: ismej2016185x8.pdf [file ismej2016185x8.pdf]

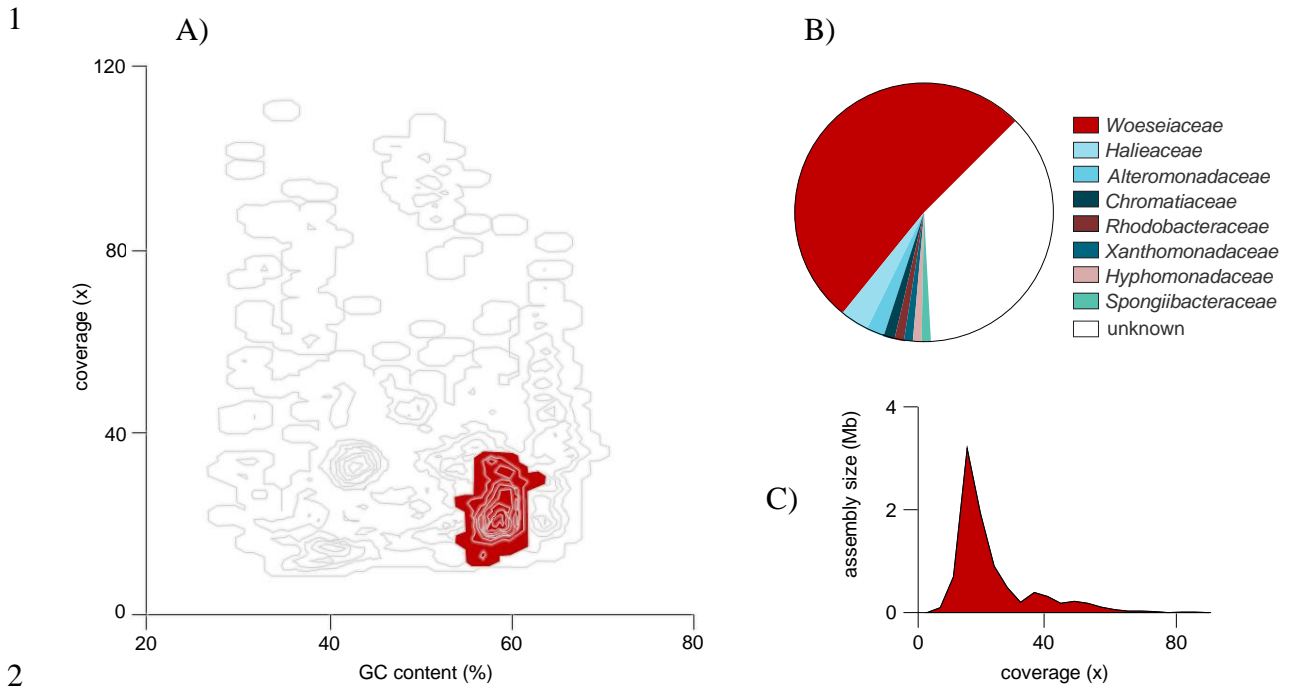

**Figure S5.** GC-content vs. sequence coverage plot of the Janssand sediment metagenome assembly. A) Highlighted in red is the GC-content vs. coverage area of bin JSS\_woes1 belonging to the *Woeseiaceae*/JTB255. B) Taxonomic distribution of ORFs in bin JSS\_woes1. C) Coverage distribution of bin JSS\_woes1 based on a 95% minimal identity mapping of paired-end sequence reads from the Janssand metagenome. Figures were generated in Metawatt (Strous *et al.*, 2012).
