# Supplementary material
Source: PubMed Central journal article supplement (PMC5437919)
Supplement: ismej2016185x9.pdf [file ismej2016185x9.pdf]

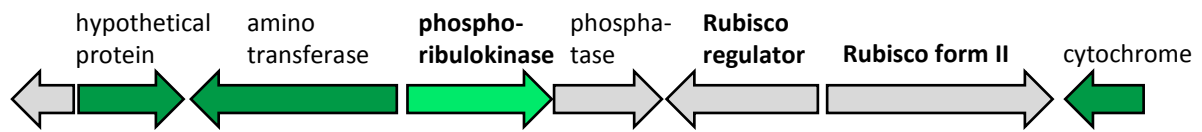

**Figure S6.** Gene neighborhood of the Rubisco form II encoding gene. The entire contig covers 7.1 kb in length. In dark green, predicted protein sequences with best BLASTp hit to *Woeseia oceani*, in light green, phosphoribulokinase with best hit to the metagenomic bin WOR\_SG8\_31 (*Woeseiaceae*/JTB255).
