# Supplementary material
Source: PubMed Central journal article supplement (PMC5437919)
Supplement: ismej2016185x11.pdf [file ismej2016185x11.pdf]

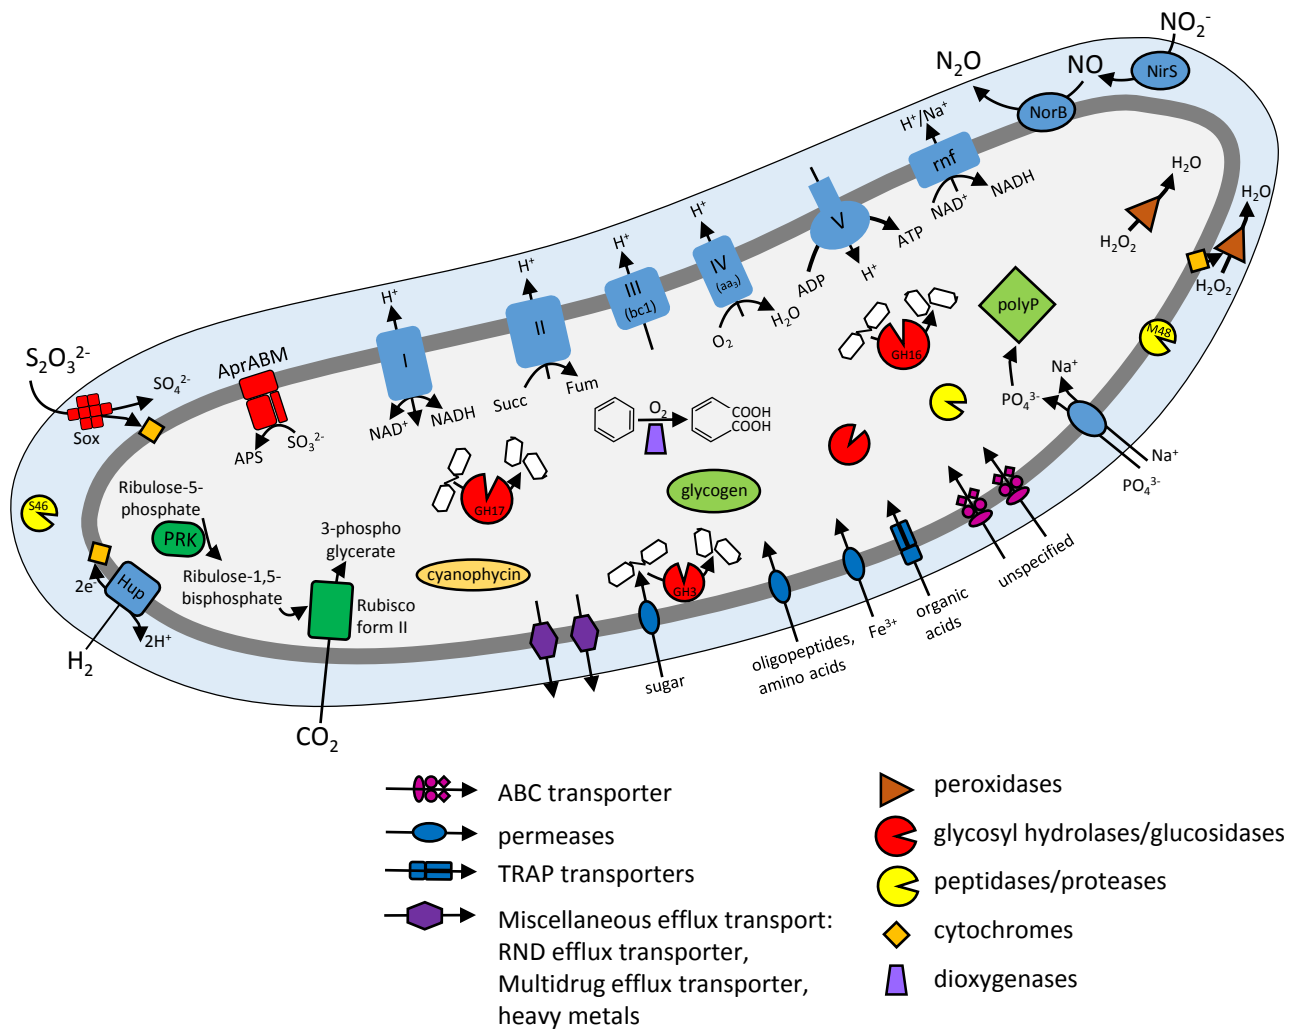

**Figure S8.** Simplified schematic view of combined metabolic features encoded in the SAG 1868\_B and the metagenomic bins 20\_j1 and JSS\_woes1 from site Janssand (see Table 1).
